# Supplementary material
Source: PubMed Central journal article supplement (PMC5777186)
Supplement: 2017_182295-Disclosures_and_Contributions.pdf [file 2017_182295-Disclosures_and_Contributions.pdf]

Haematologica  
HAEMATOL/2017/182295  
Version 1

High throughput sequencing for rapid diagnosis of inherited platelet disorders: A case for a European consensus

Alan T Nurden and Paquita Nurden

Disclosures: None

Contributions: ATN and PN wrote this editorial
